# Supplementary material for: A temporal assessment of anthropogenic marine debris on sandy beaches from Ecuador’s southern coast
Source: Frontiers journal article supplement (doi:10.3389/fmars.2022.977650), 2022-09-30
Supplement: Data_Sheet_1.xlsx [file Data_Sheet_1.xlsx]

## Sheet: Abundance
Table 1. AMD temporal abundance (Items/m2) per monitored sites
	2018	2019							2020
	Dec	Apr	June	July	Sept	Oct	Nov	Dec	Jan	Feb	Mean
Varadero	2.50463	3.43981	7.80556	5.21759	3.05556	2.19907	2.91204	2.58333	1.95833	1.8287	3.35046
Delfin	2.65741	2.05093	2.12037	3.12037	2.87963	1.63889	1.89352	1.32407	1.59259	2.27778	2.15556
Muyuyo	0.263889	1.20833	0.143519	0.287037	0.421296	0.185185	0.106481	0.162037	0.273148	0.361111	0.341204

## Sheet: AMD Size
Table 2. AMD Size per sites
Site	AMD size
Varadero	2.712
Varadero	3.499
Varadero	3.381
Varadero	2.791
Varadero	4.246
Varadero	3.157
Varadero	3.097
Varadero	2.995
Varadero	3.139
Varadero	2.512
Varadero	2.573
Varadero	4.502
Varadero	4.189
Varadero	11.165
Varadero	9.277
Varadero	18.964
Varadero	10.567
Varadero	4.332
Varadero	2.528
Varadero	5.114
Varadero	3.167
Varadero	6.114
Varadero	3.167
Varadero	2.604
Varadero	2.731
Varadero	3.769
Varadero	7.136
Varadero	17.878
Varadero	17.909
Varadero	17.797
Varadero	16.636
Varadero	8.574
Varadero	8.892
Varadero	6.738
Varadero	22.231
Varadero	7.4
Varadero	8.309
Varadero	9.496
Varadero	9.285
Varadero	10.647
Varadero	4.238
Varadero	12.625
Varadero	2.66
Varadero	6.724
Varadero	5.688
Varadero	3.944
Varadero	3.051
Varadero	2.806
Varadero	3.753
Varadero	2.731
Varadero	4.851
Varadero	7.596
Varadero	5.344
Varadero	4.822
Varadero	3.307
Varadero	5.728
Varadero	3.867
Varadero	4.962
Varadero	10.103
Varadero	7.94
Varadero	6.246
Varadero	4.626
Varadero	19.642
Varadero	8.975
Varadero	6.708
Varadero	22.421
Varadero	4.864
Varadero	16.663
Varadero	19.722
Varadero	24.822
Varadero	4.751
Varadero	5.337
Varadero	6.821
Varadero	28.985
Varadero	5.863
Varadero	3.121
Varadero	4.187
Varadero	3.165
Varadero	6.134
Varadero	8.079
Varadero	8.19
Varadero	9.294
Varadero	15.354
Varadero	17.743
Varadero	5.232
Varadero	11.565
Varadero	7.378
Varadero	7.371
Varadero	5.152
Varadero	2.961
Varadero	7.192
Varadero	4.38
Varadero	3.158
Varadero	4.853
Varadero	2.5
Varadero	2.554
Varadero	2.946
Varadero	7.026
Varadero	2.5
Varadero	2.534
Varadero	2.876
Varadero	7.087
Varadero	15.009
Varadero	5.398
Varadero	15.816
Varadero	5.518
Varadero	7.479
Varadero	3.522
Varadero	3.319
Varadero	15.092
Varadero	4.667
Varadero	3.929
Varadero	4.083
Varadero	3.712
Varadero	2.899
Varadero	4.618
Varadero	6.265
Varadero	3.05
Varadero	4.864
Varadero	4.529
Varadero	2.713
Varadero	2.592
Varadero	2.828
Varadero	3.243
Varadero	3.981
Varadero	7.503
Varadero	8.443
Varadero	7.934
Varadero	15.948
Varadero	6.562
Varadero	16.859
Varadero	11.817
Varadero	8.395
Varadero	5.114
Varadero	11.367
Varadero	6.562
Varadero	19.493
Varadero	3.621
Varadero	9.32
Varadero	5.356
Varadero	25.389
Varadero	11.632
Varadero	16.979
Varadero	19.342
Varadero	8.667
Varadero	17.94
Varadero	9.059
Varadero	2.865
Varadero	3.04
Varadero	4.436
Varadero	20.07
Varadero	14.287
Varadero	3.753
Varadero	5.741
Varadero	7.029
Varadero	2.537
Varadero	4.951
Varadero	5.214
Varadero	5.116
Varadero	3.07
Varadero	3.68
Varadero	26.304
Varadero	4.628
Varadero	3.359
Varadero	44.324
Varadero	6.553
Varadero	37.081
Varadero	39.529
Varadero	17.329
Varadero	6.517
Varadero	8.703
Varadero	4.147
Varadero	7.039
Varadero	2.619
Varadero	5.057
Varadero	6.47
Varadero	3.813
Varadero	7.672
Varadero	8.078
Varadero	4.964
Varadero	20.096
Varadero	8.396
Varadero	10.017
Varadero	3.321
Varadero	3.634
Varadero	5.695
Varadero	4.829
Varadero	10.993
Varadero	8.664
Varadero	10.022
Varadero	5.019
Varadero	8.962
Varadero	16.842
Varadero	18.256
Varadero	4.073
Varadero	4.666
Varadero	4.011
Varadero	4.835
Varadero	2.819
Varadero	5.505
Varadero	5.512
Varadero	3.129
Varadero	5.995
Varadero	4.875
Varadero	8.351
Varadero	3.865
Varadero	7.799
Varadero	29.69
Varadero	7.702
Varadero	4.894
Varadero	2.536
Varadero	3.971
Varadero	11.629
Varadero	3.283
Varadero	2.69
Varadero	3.776
Varadero	7.993
Varadero	8.436
Varadero	2.755
Varadero	44.025
Varadero	3.591
Varadero	19.554
Varadero	20.07
Varadero	10.188
Varadero	7.005
Varadero	4.546
Varadero	15.986
Varadero	18.103
Varadero	2.814
Varadero	11.633
Varadero	34.804
Varadero	15.372
Varadero	4.167
Varadero	2.536
Varadero	8.469
Varadero	3.348
Varadero	3.533
Varadero	5.784
Varadero	18.683
Varadero	34.353
Varadero	3.029
Varadero	12.257
Varadero	9.169
Varadero	17.337
Varadero	3.187
Varadero	3.249
Varadero	37.394
Varadero	14.183
Varadero	17.527
Varadero	8.805
Varadero	2.746
Varadero	7.381
Varadero	5.417
Varadero	7.471
Varadero	3.882
Varadero	2.785
Varadero	18.144
Varadero	10.097
Varadero	4.777
Varadero	3.71
Varadero	16.36
Varadero	17.632
Varadero	2.806
Varadero	4.602
Varadero	4.544
Varadero	3.059
Varadero	2.898
Varadero	3.022
Varadero	4.776
Varadero	24.809
Varadero	20.607
Varadero	20.088
Varadero	15.245
Varadero	22.578
Varadero	10.448
Varadero	19.137
Varadero	8.858
Varadero	6.581
Varadero	7.469
Varadero	2.958
Varadero	11.075
Varadero	24.353
Varadero	15.705
Varadero	6.577
Varadero	6.161
Varadero	7.139
Varadero	6.751
Varadero	10.072
Varadero	5.473
Varadero	16.22
Varadero	30.106
Varadero	25.468
Varadero	25.797
Varadero	13.773
Varadero	13.741
Varadero	13.649
Varadero	9.839
Varadero	3.85
Varadero	8.569
Varadero	20.767
Varadero	20.676
Varadero	8.231
Varadero	13.071
Varadero	11.107
Varadero	12.003
Varadero	12.271
Varadero	14.751
Varadero	14.5
Varadero	11.963
Varadero	8.255
Varadero	6.411
Varadero	7.566
Varadero	7.918
Varadero	6.671
Varadero	14.963
Varadero	15.342
Varadero	16.063
Varadero	10.134
Varadero	17.399
Varadero	17.661
Varadero	24.125
Varadero	108.456
Varadero	19.207
Varadero	19.594
Varadero	6.888
Varadero	13.727
Varadero	14.621
Varadero	6.775
Varadero	3.162
Varadero	4.665
Varadero	3.649
Varadero	3.644
Varadero	6.343
Varadero	9.026
Varadero	3.183
Varadero	3.184
Varadero	8.013
Varadero	20.624
Varadero	9.986
Varadero	10.305
Varadero	9.35
Varadero	11.554
Varadero	11.034
Varadero	10.158
Varadero	10.392
Varadero	10.404
Varadero	10.386
Varadero	10.103
Varadero	10.139
Varadero	30.066
Varadero	10.205
Varadero	19.678
Varadero	9.823
Varadero	6.841
Varadero	8.116
Varadero	6.111
Varadero	3.446
Varadero	3.481
Varadero	17.435
Varadero	10.475
Varadero	8.778
Varadero	10.827
Varadero	5.434
Varadero	7.849
Varadero	27.929
Varadero	22.945
Varadero	8.646
Varadero	11.935
Varadero	9.148
Varadero	8.658
Varadero	9.347
Varadero	6.936
Varadero	5.811
Varadero	16.205
Varadero	17.873
Varadero	20.588
Varadero	7.475
Varadero	8.661
Varadero	11.678
Varadero	4.641
Varadero	21.175
Varadero	20.653
Varadero	10.2
Varadero	5.113
Varadero	6.82
Varadero	15.93
Varadero	18.214
Varadero	8.169
Varadero	16.242
Varadero	3.238
Varadero	11.359
Varadero	4.535
Varadero	9.482
Varadero	18.505
Varadero	10.723
Varadero	5.759
Varadero	6.499
Varadero	7.723
Varadero	7.378
Varadero	4.02
Varadero	16.105
Varadero	20.707
Varadero	20.091
Varadero	12.176
Varadero	5.184
Varadero	3.624
Varadero	8.067
Varadero	3.498
Varadero	23.075
Varadero	9.475
Varadero	7.795
Varadero	11.149
Varadero	3.139
Varadero	14.145
Varadero	7.322
Varadero	18.289
Varadero	18.362
Varadero	18.725
Varadero	18.315
Varadero	3.234
Varadero	3.224
Varadero	11.735
Varadero	10.999
Varadero	10.792
Varadero	6.784
Varadero	11.497
Varadero	15.128
Varadero	13.616
Varadero	30.011
Varadero	16.917
Varadero	15.364
Varadero	16.195
Varadero	14.502
Varadero	41.125
Varadero	3.489
Varadero	2.968
Varadero	3.416
Varadero	7.128
Varadero	6.931
Varadero	24.185
Varadero	21.154
Varadero	26.332
Varadero	32.32
Varadero	23.039
Varadero	13.665
Varadero	17.804
Varadero	15.273
Varadero	13.75
Varadero	16.652
Varadero	20.384
Varadero	20.007
Varadero	19.557
Varadero	13.894
Varadero	22.311
Varadero	21.398
Varadero	3.762
Varadero	15.692
Varadero	20.047
Varadero	3.227
Varadero	4.484
Varadero	11.474
Varadero	13.156
Varadero	4.846
Varadero	4.357
Varadero	25.636
Varadero	15.58
Varadero	11.119
Varadero	13.565
Varadero	13.573
Varadero	3.111
Varadero	2.895
Varadero	21.907
Varadero	6.263
Varadero	12.015
Varadero	10.916
Varadero	9.1
Varadero	4.225
Varadero	4.126
Varadero	9.252
Varadero	9.909
Varadero	23.943
Varadero	14.111
Varadero	13.255
Varadero	8.627
Varadero	14.531
Varadero	11.957
Varadero	4.974
Varadero	16.988
Varadero	15.802
Varadero	19.672
Varadero	21.837
Varadero	14.792
Varadero	10.164
Varadero	7.009
Varadero	33.466
Varadero	21.804
Varadero	11.244
Varadero	8.863
Varadero	4.943
Varadero	4.596
Varadero	9.219
Varadero	7.841
Varadero	7.605
Varadero	10.017
Varadero	6.033
Varadero	3.979
Varadero	5.592
Varadero	17.915
Varadero	9.807
Varadero	5.81
Varadero	10.665
Varadero	8.038
Varadero	2.765
Varadero	6.695
Varadero	6.95
Varadero	15.345
Varadero	4.006
Varadero	5.635
Varadero	4.05
Varadero	4.04
Varadero	4.74
Varadero	3.664
Varadero	6.301
Varadero	4.163
Varadero	8.855
Varadero	5.318
Varadero	7.106
Varadero	5.434
Varadero	4.968
Varadero	3.127
Varadero	5
Varadero	9.805
Varadero	6.251
Varadero	8.757
Varadero	12.118
Varadero	8.468
Varadero	10.783
Varadero	10.191
Varadero	4.859
Varadero	8.732
Varadero	8.123
Varadero	9.995
Varadero	10.819
Varadero	8.998
Varadero	10.702
Varadero	11.71
Varadero	4.548
Varadero	11.75
Varadero	4.091
Varadero	4.606
Varadero	7.32
Varadero	3.971
Varadero	21.864
Varadero	14.73
Varadero	5.655
Varadero	12.525
Varadero	12.048
Varadero	10.996
Varadero	13.814
Varadero	4.134
Varadero	3.49
Varadero	2.704
Varadero	3.523
Varadero	16.044
Varadero	7.927
Varadero	5.505
Varadero	9.025
Varadero	12.929
Varadero	36.373
Varadero	12.692
Varadero	17.37
Varadero	9.763
Varadero	6.574
Varadero	7.634
Varadero	2.669
Varadero	7.346
Varadero	6.693
Varadero	2.572
Varadero	3.587
Varadero	3.196
Varadero	6.977
Varadero	3.844
Varadero	3.17
Varadero	2.579
Varadero	10.149
Varadero	2.903
Varadero	2.505
Varadero	2.727
Varadero	2.71
Varadero	6.518
Varadero	3.242
Varadero	3.328
Varadero	3.141
Varadero	3.35
Varadero	3.23
Varadero	3.367
Varadero	3.762
Varadero	10.118
Varadero	4.609
Varadero	4.821
Varadero	9.895
Varadero	6.477
Varadero	22.329
Varadero	9.06
Varadero	9.837
Varadero	9.317
Varadero	10.767
Varadero	12.358
Varadero	8.7
Varadero	6.665
Varadero	2.534
Varadero	3.578
Varadero	3.894
Varadero	2.851
Varadero	4.138
Varadero	6.844
Varadero	8.608
Varadero	3.679
Varadero	4.34
Varadero	4.117
Varadero	3.994
Varadero	3.499
Varadero	3.799
Varadero	4
Varadero	3.844
Varadero	3.917
Varadero	3.547
Varadero	3.98
Varadero	9.205
Varadero	13.585
Varadero	7.62
Varadero	107.199
Varadero	5.455
Varadero	3.53
Varadero	5.202
Varadero	9.3
Varadero	8.093
Varadero	10.399
Varadero	3.465
Varadero	2.941
Varadero	3.1
Varadero	4.314
Varadero	2.691
Varadero	2.828
Varadero	2.679
Varadero	3.608
Varadero	2.728
Varadero	2.734
Varadero	2.963
Varadero	3.942
Varadero	2.783
Varadero	2.722
Varadero	2.834
Varadero	2.509
Varadero	3.558
Varadero	2.522
Varadero	3.94
Varadero	3.481
Varadero	2.624
Varadero	2.917
Varadero	4.305
Varadero	3.841
Varadero	3.643
Varadero	3.584
Varadero	2.965
Varadero	3.328
Varadero	6.095
Varadero	4.857
Varadero	13.731
Varadero	6.723
Varadero	5.171
Varadero	3.482
Varadero	4.021
Varadero	5.911
Varadero	9.823
Varadero	7.219
Varadero	16.583
Varadero	7.592
Varadero	12.808
Varadero	5.803
Varadero	3.531
Varadero	3.449
Varadero	2.967
Varadero	3.495
Varadero	3.584
Varadero	3.679
Varadero	5.886
Varadero	3.668
Varadero	3.258
Varadero	4.767
Varadero	3.235
Varadero	2.773
Varadero	3.331
Varadero	2.7
Varadero	2.879
Varadero	4.568
Varadero	4.67
Varadero	2.927
Varadero	7.985
Varadero	8.842
Varadero	5.567
Varadero	6.228
Varadero	6.252
Varadero	4.107
Varadero	5.372
Varadero	6.563
Varadero	7.027
Varadero	5.725
Varadero	4.724
Varadero	5.242
Varadero	6.817
Varadero	6.214
Varadero	18.408
Varadero	19.105
Varadero	15.531
Varadero	11.922
Varadero	7.91
Varadero	16.55
Varadero	19.392
Varadero	18.711
Varadero	4.588
Varadero	3.259
Varadero	3.626
Varadero	6.776
Varadero	3.552
Varadero	3.774
Varadero	3.242
Varadero	4.433
Varadero	8.132
Varadero	37.577
Varadero	20.16
Varadero	8.622
Varadero	11.099
Varadero	7.912
Varadero	7.819
Varadero	11.317
Varadero	9.825
Varadero	8.898
Varadero	8.442
Varadero	8.301
Varadero	8.646
Varadero	9.172
Varadero	15.794
Varadero	13.431
Varadero	12.815
Varadero	15.094
Varadero	17.57
Varadero	17.28
Varadero	16.594
Varadero	16.946
Varadero	16.425
Varadero	16.919
Varadero	12.335
Varadero	19.41
Varadero	22.965
Varadero	35.544
Varadero	23.38
Varadero	19.732
Varadero	22.797
Varadero	8.598
Varadero	18.121
Varadero	17.291
Varadero	12.472
Varadero	10.24
Varadero	8.702
Varadero	9.056
Varadero	4.261
Varadero	4.323
Varadero	3.225
Varadero	3.636
Varadero	6.769
Varadero	3.439
Varadero	5.139
Varadero	40.686
Varadero	16.482
Varadero	37.832
Varadero	15.914
Varadero	8.48
Varadero	4.719
Varadero	4.076
Varadero	6.012
Varadero	8.839
Varadero	22.758
Varadero	22.21
Varadero	20.977
Varadero	16.242
Varadero	7.979
Varadero	22.383
Varadero	18.052
Varadero	15.848
Varadero	5.643
Varadero	3.857
Varadero	3.257
Varadero	4.281
Varadero	4.864
Varadero	3.73
Varadero	17.889
Varadero	5.834
Varadero	3.184
Varadero	2.784
Varadero	3.714
Varadero	3.151
Varadero	3.587
Varadero	24.88
Varadero	5.244
Varadero	9.992
Varadero	13.581
Varadero	13.487
Varadero	10.288
Varadero	6.035
Varadero	17.472
Varadero	6.41
Varadero	10.549
Varadero	11.104
Varadero	5.477
Varadero	6.136
Varadero	3.545
Varadero	3.253
Varadero	4.092
Varadero	6.164
Varadero	2.957
Varadero	4.239
Varadero	5.046
Varadero	6.215
Varadero	3.266
Varadero	4.866
Varadero	8.073
Varadero	8.893
Varadero	41.227
Varadero	3.548
Varadero	6.54
Varadero	5.597
Varadero	2.569
Varadero	10.301
Varadero	3.972
Varadero	3.264
Varadero	4.243
Varadero	4.492
Varadero	2.741
Varadero	26.314
Varadero	22.822
Varadero	8.272
Varadero	12.309
Varadero	5.14
Varadero	4.019
Varadero	5.896
Varadero	9.063
Varadero	3.66
Varadero	4.03
Varadero	8.82
Varadero	17.797
Varadero	8.975
Varadero	5.876
Varadero	3.623
Varadero	3.587
Varadero	3.179
Varadero	13.26
Varadero	14.62
Varadero	4.383
Varadero	2.936
Varadero	6.725
Varadero	4.915
Varadero	4.234
Varadero	4.738
Varadero	4.337
Varadero	3.808
Varadero	21.588
Varadero	16.9
Varadero	12.984
Varadero	8.016
Varadero	6.347
Varadero	19.174
Varadero	8.327
Varadero	15.83
Varadero	16.865
Varadero	5.379
Varadero	7.725
Varadero	16.973
Varadero	14.63
Varadero	12.338
Varadero	5.941
Varadero	11.243
Varadero	9.796
Varadero	6.403
Varadero	10.685
Varadero	11.104
Varadero	7.333
Varadero	2.772
Varadero	7.948
Varadero	6.376
Varadero	2.912
Varadero	3.26
Varadero	3.801
Varadero	3.419
Varadero	3.638
Varadero	3.519
Varadero	3.019
Varadero	5.51
Varadero	5.063
Varadero	3.027
Varadero	5.425
Varadero	11.936
Varadero	6.293
Varadero	13.731
Varadero	15.158
Varadero	8.144
Varadero	3.118
Varadero	5.114
Varadero	4.364
Varadero	2.79
Varadero	4.075
Varadero	2.994
Varadero	5.551
Varadero	4.846
Varadero	17.944
Varadero	18.246
Varadero	21.523
Varadero	16.298
Varadero	9.386
Varadero	10.224
Varadero	10.38
Varadero	10.266
Varadero	10.977
Varadero	11.512
Varadero	10.336
Varadero	7.826
Varadero	12.158
Varadero	12.16
Varadero	12.938
Varadero	9.568
Varadero	10.715
Varadero	7.248
Varadero	11.611
Varadero	6.847
Varadero	9.952
Varadero	9.532
Varadero	12.547
Varadero	9.179
Varadero	11.533
Varadero	10.006
Varadero	32.578
Varadero	10.844
Varadero	14.14
Varadero	19.584
Varadero	4.728
Varadero	3.073
Varadero	4.728
Varadero	4.682
Varadero	11.467
Varadero	5.691
Varadero	5.294
Varadero	4.576
Varadero	13.215
Varadero	7.156
Varadero	3.93
Varadero	4.94
Varadero	4.29
Varadero	4.071
Varadero	4.487
Varadero	3.794
Varadero	3.61
Varadero	4.051
Varadero	4.981
Varadero	4.612
Varadero	4.831
Varadero	19.707
Varadero	20.681
Varadero	22.135
Varadero	15.468
Varadero	17.055
Varadero	16.618
Varadero	23.42
Varadero	25.161
Varadero	16.384
Varadero	18.886
Varadero	5.594
Varadero	10.819
Varadero	15.332
Varadero	5.364
Varadero	3.062
Varadero	17.729
Varadero	4.156
Varadero	4.832
Varadero	13.635
Varadero	9.201
Varadero	16.876
Varadero	12.478
Varadero	25.726
Varadero	6.695
Varadero	9.379
Varadero	6.32
Varadero	3.928
Varadero	11.152
Varadero	8.377
Varadero	8.863
Varadero	5.654
Varadero	6.472
Varadero	8.408
Varadero	4.987
Varadero	15.947
Varadero	9.601
Varadero	7.812
Varadero	6.772
Varadero	14.626
Varadero	24.251
Varadero	11.11
Varadero	3.686
Varadero	5.223
Varadero	5.135
Varadero	4.324
Varadero	3.451
Varadero	2.918
Varadero	4.237
Varadero	5.512
Varadero	3.483
Varadero	3.55
Varadero	10.248
Varadero	15.654
Varadero	18.437
Varadero	6.897
Varadero	7.104
Varadero	5.051
Varadero	3.771
Varadero	6.635
Varadero	2.834
Varadero	2.982
Varadero	5.036
Varadero	2.868
Varadero	16.552
Varadero	145.747
Varadero	11.345
Varadero	11.939
Varadero	2.881
Varadero	10.649
Varadero	10.389
Varadero	3.48
Varadero	16.781
Varadero	10.301
Varadero	11.881
Varadero	8.81
Varadero	3.445
Varadero	10.015
Varadero	16.666
Varadero	9.735
Varadero	4.045
Varadero	8.76
Varadero	17.218
Varadero	14.154
Varadero	11.763
Varadero	19.411
Varadero	14.778
Varadero	9.743
Varadero	12.258
Varadero	10
Varadero	10.514
Varadero	10.661
Varadero	11.014
Varadero	9.91
Varadero	6.807
Varadero	9.301
Varadero	4.367
Varadero	16.347
Varadero	12.141
Varadero	18.599
Varadero	13.371
Varadero	17.483
Varadero	17.19
Varadero	6.3
Varadero	3.993
Varadero	3.008
Varadero	6.049
Varadero	8.692
Varadero	8.718
Varadero	9.055
Varadero	6.675
Varadero	4.014
Varadero	5.804
Varadero	5.33
Varadero	4.904
Varadero	3.135
Varadero	4.213
Varadero	2.544
Varadero	12.463
Varadero	14.993
Varadero	25.86
Varadero	11.73
Varadero	9.504
Varadero	3.899
Varadero	13.32
Varadero	12.511
Varadero	22.906
Varadero	5.617
Varadero	26.532
Varadero	3.683
Varadero	18.136
Varadero	19.293
Varadero	13.523
Varadero	7.829
Varadero	11.207
Varadero	18.754
Varadero	18.131
Varadero	19.349
Varadero	18.891
Varadero	13.467
Varadero	6.945
Varadero	10.322
Varadero	11.73
Varadero	26.808
Varadero	10.161
Varadero	6.009
Varadero	3.345
Varadero	2.616
Varadero	2.832
Varadero	2.636
Varadero	3.989
Varadero	3.697
Varadero	3.122
Varadero	2.894
Varadero	3.175
Varadero	4.287
Varadero	3.584
Varadero	5.751
Varadero	3.034
Varadero	3.073
Varadero	4.171
Varadero	7.44
Varadero	7.585
Varadero	8.023
Varadero	9.45
Varadero	6.136
Varadero	2.974
Varadero	3.149
Varadero	3.416
Varadero	2.994
Varadero	2.636
Varadero	3.07
Varadero	2.585
Varadero	5.355
Varadero	3.786
Varadero	3.649
Varadero	3.319
Varadero	2.994
Varadero	3.387
Varadero	4.009
Varadero	5.524
Varadero	16.46
Varadero	6.717
Varadero	9.731
Varadero	7.505
Varadero	19.251
Varadero	4.499
Varadero	4.155
Varadero	8.477
Varadero	5.807
Varadero	4.146
Varadero	3.269
Varadero	10.49
Varadero	4.832
Varadero	2.823
Varadero	3.598
Varadero	5.449
Varadero	7.813
Varadero	5.579
Varadero	8.618
Varadero	2.887
Varadero	4.133
Varadero	4.568
Varadero	2.562
Varadero	4.646
Varadero	6.108
Varadero	3.811
Varadero	2.901
Varadero	4.592
Varadero	9.67
Varadero	14.215
Varadero	4.88
Varadero	2.509
Varadero	3.251
Varadero	5.451
Varadero	4.211
Varadero	13.738
Varadero	15.748
Varadero	8.159
Varadero	17.945
Varadero	3.876
Varadero	12.546
Varadero	7.274
Varadero	5.078
Varadero	7.145
Varadero	4.281
Varadero	4.341
Varadero	5.728
Varadero	3.455
Varadero	8.127
Varadero	5.77
Varadero	5.828
Varadero	6.435
Varadero	4.075
Varadero	10.921
Varadero	28.257
Varadero	3.916
Varadero	2.965
Varadero	4.121
Varadero	36.036
Varadero	13.776
Varadero	4.578
Varadero	5.928
Varadero	3.522
Varadero	14.25
Varadero	10.479
Varadero	7.479
Varadero	13.506
Varadero	8.283
Varadero	20.604
Varadero	7.726
Varadero	4.437
Varadero	9.684
Varadero	8.022
Varadero	9.884
Varadero	8.596
Varadero	15.957
Varadero	5.187
Varadero	8.976
Varadero	4.651
Varadero	3.421
Varadero	3.216
Varadero	7.901
Varadero	4.649
Varadero	4.345
Varadero	8.503
Varadero	19.931
Varadero	4.422
Varadero	3.867
Varadero	3.801
Varadero	10.108
Varadero	19
Varadero	19.479
Varadero	18.588
Varadero	19.395
Varadero	15.577
Varadero	19.79
Varadero	19.423
Varadero	19.426
Varadero	5.429
Varadero	5.959
Varadero	17.078
Varadero	11.859
Varadero	2.884
Varadero	2.736
Varadero	3.191
Varadero	2.587
Varadero	3.498
Varadero	3.885
Varadero	5.098
Varadero	5.212
Varadero	3.425
Varadero	4.05
Varadero	5.148
Varadero	3.097
Varadero	3.588
Varadero	3.562
Varadero	2.538
Varadero	3.721
Varadero	3.925
Varadero	3.287
Varadero	3.425
Varadero	3.856
Varadero	3.807
Varadero	3.468
Varadero	3.914
Varadero	3.699
Varadero	3.493
Varadero	3.127
Varadero	5.847
Varadero	2.942
Varadero	4.94
Varadero	3.536
Varadero	3.661
Varadero	3.063
Varadero	4.178
Varadero	3.435
Varadero	7.314
Varadero	6.83
Varadero	3.367
Varadero	3.402
Varadero	3.658
Varadero	4.069
Varadero	6.879
Varadero	9.787
Varadero	10.948
Varadero	7.079
Varadero	10.648
Varadero	8.382
Varadero	9.91
Varadero	10.44
Varadero	14.641
Varadero	15.336
Varadero	9.754
Varadero	7.926
Varadero	4.945
Varadero	3.173
Varadero	3.592
Varadero	2.73
Varadero	2.508
Varadero	3.589
Varadero	6.666
Varadero	3.325
Varadero	3.049
Varadero	2.834
Varadero	2.792
Varadero	4.157
Varadero	3.002
Varadero	2.743
Varadero	2.505
Varadero	6.297
Varadero	3.108
Varadero	6.661
Varadero	3.481
Varadero	16.015
Varadero	18.452
Varadero	14.055
Varadero	16.612
Varadero	17.544
Varadero	5.925
Varadero	25.504
Varadero	21.824
Varadero	23.025
Varadero	22.394
Varadero	22.103
Varadero	24.6
Varadero	12.876
Varadero	8.142
Varadero	12.977
Varadero	19.145
Varadero	14.234
Varadero	9.18
Varadero	10.085
Varadero	15.807
Varadero	11.951
Varadero	10.506
Varadero	10.971
Varadero	12.835
Varadero	3.418
Varadero	12.662
Varadero	13.005
Varadero	4.248
Varadero	3.561
Varadero	2.731
Varadero	3.242
Varadero	5.984
Varadero	12.055
Varadero	17.179
Varadero	15.855
Varadero	10.541
Varadero	18.921
Varadero	13.779
Varadero	12.688
Varadero	8.586
Varadero	4.811
Varadero	14.797
Varadero	10.25
Varadero	8.719
Varadero	17.869
Varadero	12.291
Varadero	5.075
Varadero	7.82
Varadero	9.321
Varadero	8.63
Varadero	11.66
Varadero	14.652
Varadero	13.654
Varadero	13.412
Varadero	13.904
Varadero	6.462
Varadero	15.977
Varadero	16.763
Varadero	11.09
Varadero	12.177
Varadero	8.04
Varadero	4.347
Varadero	2.825
Varadero	3.43
Varadero	2.997
Varadero	2.992
Varadero	3.77
Varadero	3.544
Varadero	4.973
Varadero	3.009
Varadero	3.089
Varadero	4.128
Varadero	3.142
Varadero	3.783
Varadero	3.123
Varadero	4.347
Varadero	3.598
Varadero	3.41
Varadero	2.968
Varadero	3.105
Varadero	3.212
Varadero	3.74
Varadero	3.927
Varadero	2.948
Varadero	2.822
Varadero	2.568
Varadero	3.019
Varadero	3.033
Varadero	3.597
Varadero	3.251
Varadero	3.687
Varadero	4.584
Varadero	2.679
Varadero	5.1
Varadero	4.538
Varadero	3.493
Varadero	4.483
Varadero	3.546
Varadero	3.561
Varadero	3.465
Varadero	2.877
Varadero	6.031
Varadero	5.81
Varadero	3.091
Varadero	3.771
Varadero	3.444
Varadero	8.209
Varadero	7.395
Varadero	12.569
Varadero	5.81
Varadero	5.791
Varadero	3.643
Varadero	4.695
Varadero	8.221
Varadero	4.182
Varadero	12.483
Varadero	8.388
Varadero	7.883
Varadero	3.701
Varadero	2.858
Varadero	3.206
Varadero	3.92
Varadero	6.069
Varadero	3.439
Varadero	6.114
Varadero	3.13
Varadero	2.617
Varadero	3.198
Varadero	4.323
Varadero	4.452
Varadero	2.738
Varadero	2.634
Varadero	3.019
Varadero	3.239
Varadero	2.834
Varadero	2.926
Varadero	2.646
Varadero	3.348
Varadero	4.506
Varadero	3.784
Varadero	3.474
Varadero	6.691
Varadero	3.4
Varadero	4.311
Varadero	7.952
Varadero	4.473
Varadero	4.128
Varadero	3.28
Varadero	5.868
Varadero	5.077
Varadero	2.823
Varadero	9.097
Varadero	16.637
Varadero	16.528
Varadero	11.294
Varadero	6.395
Varadero	4.103
Varadero	13.186
Varadero	7.682
Varadero	14.707
Varadero	6.789
Varadero	21.804
Varadero	8.396
Varadero	10.452
Varadero	11.044
Varadero	10.94
Varadero	4.483
Varadero	12.39
Varadero	11.14
Varadero	11.252
Varadero	11.209
Varadero	12.525
Varadero	12.247
Varadero	9.88
Varadero	10.301
Varadero	9.486
Varadero	9.875
Varadero	12.564
Varadero	8.257
Varadero	8.207
Varadero	16.302
Varadero	17.81
Varadero	16.96
Varadero	19.141
Varadero	17.938
Varadero	19.4
Varadero	10.509
Varadero	14.745
Varadero	7.834
Varadero	26.147
Varadero	26.147
Varadero	24.262
Varadero	28.443
Varadero	9.984
Varadero	15.236
Varadero	4.944
Varadero	2.856
Varadero	6.283
Varadero	4.645
Varadero	6.124
Varadero	8.336
Varadero	6.214
Varadero	9.117
Varadero	8.591
Varadero	4.297
Varadero	8.012
Varadero	4.846
Varadero	20.761
Varadero	10.153
Varadero	13.437
Varadero	3.859
Varadero	2.859
Varadero	3.162
Varadero	2.927
Varadero	5.23
Varadero	3.747
Varadero	3.551
Varadero	24.932
Varadero	8.287
Varadero	17.234
Varadero	4.551
Varadero	6.346
Varadero	3.573
Varadero	5.752
Varadero	9.143
Varadero	18.726
Varadero	6.775
Varadero	6.58
Varadero	9.674
Varadero	4.253
Varadero	15.766
Varadero	9.305
Varadero	4.323
Varadero	3.105
Varadero	3.264
Varadero	20.966
Varadero	19.827
Varadero	9.19
Varadero	6.957
Varadero	6.96
Varadero	22.634
Varadero	4.699
Varadero	5.438
Varadero	6.957
Varadero	5.145
Varadero	6.836
Varadero	3.465
Varadero	3.543
Varadero	26.999
Varadero	9.109
Varadero	10.655
Varadero	12.996
Varadero	3.237
Varadero	3.821
Varadero	4.175
Varadero	5.859
Varadero	5.062
Varadero	14.926
Varadero	9.936
Varadero	18.808
Varadero	9.471
Varadero	14.943
Varadero	10.772
Varadero	8.905
Varadero	11.979
Varadero	4.087
Varadero	4.001
Varadero	3.967
Varadero	3.435
Varadero	4.822
Varadero	2.926
Varadero	7.339
Varadero	7.885
Varadero	20.787
Varadero	16.92
Varadero	11.688
Varadero	18.121
Varadero	18.096
Varadero	9.555
Varadero	8.811
Varadero	9.222
Varadero	14.228
Varadero	7.397
Varadero	3.902
Varadero	2.916
Varadero	4.415
Varadero	11.696
Varadero	3.366
Varadero	5.591
Varadero	6.884
Varadero	6.277
Varadero	10.054
Varadero	4.045
Varadero	6.304
Varadero	3.016
Varadero	9.542
Varadero	8.266
Varadero	2.541
Varadero	2.71
Varadero	11.846
Varadero	15.298
Varadero	4.849
Varadero	3.689
Varadero	16.297
Varadero	6.253
Varadero	16.378
Varadero	36.538
Varadero	3.087
Varadero	33.297
Varadero	18.536
Varadero	6.143
Varadero	4.146
Varadero	3.353
Varadero	4.472
Varadero	11.057
Varadero	3.785
Varadero	3.129
Varadero	3.208
Varadero	3.74
Varadero	9.309
Varadero	9.664
Varadero	4.567
Varadero	8.189
Varadero	18.65
Varadero	18.662
Varadero	14.719
Varadero	6.539
Varadero	8.969
Varadero	25.89
Varadero	24.504
Varadero	26.391
Varadero	22.378
Varadero	21.591
Varadero	17.077
Varadero	4.209
Varadero	8.27
Varadero	2.641
Varadero	2.591
Varadero	7.928
Varadero	6.417
Varadero	11.85
Varadero	20.369
Varadero	7.725
Varadero	5.014
Varadero	4.998
Varadero	6.171
Varadero	2.568
Varadero	14.437
Varadero	11.492
Varadero	3.086
Varadero	13.503
Varadero	19.805
Varadero	18.868
Varadero	16.655
Varadero	9.85
Varadero	4.083
Varadero	3.027
Varadero	2.782
Varadero	14.649
Varadero	11.856
Varadero	9.169
Varadero	9.666
Varadero	9.057
Varadero	11.485
Varadero	9.888
Varadero	16.37
Varadero	18.941
Varadero	6.094
Varadero	3.525
Varadero	21.827
Varadero	16.577
Varadero	7.354
Varadero	5.297
Varadero	9.865
Varadero	7.98
Varadero	10.214
Varadero	6.711
Varadero	4.069
Varadero	3.683
Varadero	3.392
Varadero	7.154
Varadero	3.39
Varadero	14.194
Varadero	10.68
Varadero	18.491
Varadero	9.833
Varadero	4.36
Varadero	5.155
Varadero	7.821
Varadero	3.013
Varadero	5.948
Varadero	20.573
Varadero	14.61
Varadero	11.327
Varadero	3.007
Varadero	4.606
Varadero	2.755
Varadero	11.904
Varadero	3.769
Varadero	9.164
Varadero	21.121
Varadero	4.113
Varadero	3.884
Varadero	2.705
Varadero	7.37
Varadero	3.271
Varadero	4.982
Varadero	7.094
Varadero	140.73
Varadero	3.391
Varadero	13.246
Varadero	10.939
Varadero	9.657
Varadero	10.438
Varadero	4.089
Varadero	6.135
Varadero	3.976
Varadero	2.778
Varadero	5.082
Varadero	3.01
Varadero	2.8
Varadero	4.439
Varadero	51.076
Varadero	9.287
Varadero	18.818
Varadero	11.175
Varadero	12.985
Varadero	11.39
Varadero	13.987
Varadero	6.435
Varadero	13.99
Varadero	9.484
Varadero	5.096
Varadero	13.946
Varadero	12.342
Varadero	15.052
Varadero	16.163
Varadero	14.956
Varadero	12.355
Varadero	15.463
Varadero	18.174
Varadero	2.626
Varadero	2.662
Varadero	4.834
Varadero	12.098
Varadero	3.992
Varadero	8.094
Varadero	5.742
Varadero	8.785
Varadero	18.398
Varadero	24.91
Varadero	19.497
Varadero	9.709
Varadero	15.227
Varadero	13.749
Varadero	11.292
Varadero	14.513
Varadero	17.722
Varadero	24.461
Varadero	8.683
Varadero	6.511
Varadero	11.653
Varadero	12.827
Varadero	4.717
Varadero	18.952
Varadero	3.666
Varadero	4.54
Varadero	32.422
Varadero	10.087
Varadero	24.965
Varadero	8.342
Varadero	11.176
Varadero	13.854
Varadero	4.375
Varadero	2.567
Varadero	9.525
Varadero	11.857
Varadero	25.555
Varadero	15.908
Varadero	15.407
Varadero	10.282
Varadero	9.6
Varadero	11.014
Varadero	22.295
Varadero	13.649
Varadero	3.734
Varadero	14.856
Varadero	9.001
Varadero	11.198
Varadero	4.788
Varadero	3.735
Varadero	5.008
Varadero	5.273
Varadero	12.114
Varadero	23.444
Varadero	10.453
Varadero	4.979
Varadero	15.178
Varadero	10.318
Varadero	15.428
Varadero	10.501
Varadero	16.705
Varadero	11.783
Varadero	12.532
Varadero	9.913
Varadero	13.093
Varadero	6.532
Varadero	5.293
Varadero	17.613
Varadero	9.335
Varadero	9.238
Varadero	7.091
Varadero	8.093
Varadero	3.876
Varadero	4.547
Varadero	5.119
Varadero	6.349
Varadero	3.153
Varadero	4.369
Varadero	5.16
Varadero	5.48
Varadero	3.961
Varadero	6.48
Varadero	14.406
Varadero	16.312
Varadero	4.691
Varadero	3.206
Varadero	3.009
Varadero	12.354
Varadero	10.867
Varadero	16.355
Varadero	7.179
Varadero	9.76
Varadero	9.095
Varadero	24.207
Varadero	5.027
Varadero	6.878
Varadero	13.008
Varadero	18.302
Varadero	3.382
Varadero	4.984
Varadero	5.437
Varadero	4.619
Varadero	13.318
Varadero	4.725
Varadero	3.539
Varadero	4.3
Varadero	5.963
Varadero	31.669
Varadero	9.525
Varadero	11.421
Varadero	10.759
Varadero	7.025
Varadero	11.322
Varadero	10.734
Varadero	10.401
Varadero	9.538
Varadero	12.168
Varadero	5.043
Varadero	3.696
Varadero	3.412
Varadero	5.338
Varadero	4.042
Varadero	3.441
Varadero	6.009
Varadero	3.545
Varadero	3.451
Varadero	9.121
Varadero	3.25
Varadero	8.439
Varadero	5.491
Varadero	3.906
Varadero	10.041
Varadero	6.243
Varadero	17.73
Varadero	21.236
Varadero	15.676
Varadero	11.516
Varadero	4.55
Varadero	4.055
Varadero	4.407
Varadero	3.207
Varadero	5.922
Varadero	9.662
Varadero	10.859
Varadero	6.498
Varadero	14.789
Varadero	7.636
Varadero	21.16
Varadero	17.742
Varadero	19.726
Varadero	17.337
Varadero	12.362
Varadero	9.987
Varadero	6.126
Varadero	5.516
Varadero	54.858
Varadero	10.696
Varadero	7.206
Varadero	5.505
Varadero	10
Varadero	5.688
Varadero	3.476
Varadero	13.144
Varadero	16.036
Varadero	7.619
Varadero	3.511
Varadero	10.148
Varadero	9.366
Varadero	9.819
Varadero	9.925
Varadero	5.508
Varadero	3.303
Varadero	5.01
Varadero	5.79
Varadero	6.655
Varadero	4.031
Varadero	23.996
Varadero	27.051
Varadero	20.738
Varadero	17.947
Varadero	8.681
Varadero	5.532
Varadero	9.237
Varadero	5.204
Varadero	7.943
Varadero	4.674
Varadero	4.832
Varadero	10.679
Varadero	3.385
Varadero	12.712
Varadero	13.702
Varadero	7.904
Varadero	9.769
Varadero	8.634
Varadero	15.653
Varadero	11.085
Varadero	16.52
Varadero	6.109
Varadero	6.852
Varadero	7.616
Varadero	10.915
Varadero	7.861
Varadero	5.086
Varadero	6.151
Varadero	5.375
Varadero	5.75
Varadero	4.823
Varadero	3.336
Varadero	3.95
Varadero	3.414
Varadero	3.354
Varadero	11.553
Varadero	5.812
Varadero	6.641
Varadero	3.595
Varadero	3.625
Varadero	20.288
Varadero	15.568
Varadero	13.463
Varadero	8.47
Varadero	14.114
Varadero	12.621
Varadero	10.143
Varadero	10.994
Varadero	19.673
Varadero	20.989
Varadero	23.812
Varadero	23.384
Varadero	7.4
Varadero	6.542
Varadero	4.334
Varadero	5.321
Varadero	8.592
Varadero	11.487
Varadero	3.527
Varadero	4.817
Varadero	10.707
Varadero	6.295
Varadero	15.249
[truncated: 3,154 more rows]
